# Supplementary material for: Studies on Silver Ions Releasing Processes and Mechanical Properties of Surface-Modified Titanium Alloy Implants
Source: MDPI journal article supplement (doi:10.3390/ijms19123962), 2018-12-09

# checkCIF/PLATON report

Structure factors have been supplied for datablock(s) pp11a-2000-sch\_shape

THIS REPORT IS FOR GUIDANCE ONLY. IF USED AS PART OF A REVIEW PROCEDURE FOR PUBLICATION, IT SHOULD NOT REPLACE THE EXPERTISE OF AN EXPERIENCED CRYSTALLOGRAPHIC REFEREE.

No syntax errors found.      CIF dictionary      Interpreting this report

## Datablock: pp11a-2000-sch\_shape

---

Bond precision:    C-C = 0.0144 Å

Wavelength=0.71073

Cell:                a=11.3277(5)                b=13.0765(5)                c=13.7547(5)  
                      alpha=116.746(4)        beta=100.869(3)        gamma=99.819(3)  
Temperature:        293 K

|                | Calculated      | Reported                          |
|----------------|-----------------|-----------------------------------|
| Volume         | 1709.37(15)     | 1709.36(13)                       |
| Space group    | P -1            | P -1                              |
| Hall group     | -P 1            | -P 1                              |
| Moiety formula | C15 Ag5 F25 O13 | 5(Ag 1+), 3(O H2), 5(C3 F5 O2 1-) |
| Sum formula    | C15 Ag5 F25 O13 | C15 H6 Ag5 F25 O13                |
| Mr             | 1402.50         | 1408.55                           |
| Dx, g cm-3     | 2.725           | 2.737                             |
| Z              | 2               | 2                                 |
| Mu (mm-1)      | 3.005           | 3.005                             |
| F000           | 1308.0          | 1320.0                            |
| F000'          | 1300.23         |                                   |
| h,k,lmax       | 14,16,17        | 14,16,17                          |
| Nref           | 6997            | 6960                              |
| Tmin,Tmax      | 0.197,0.319     | 0.279,0.395                       |
| Tmin'          | 0.165           |                                   |

Correction method= # Reported T Limits: Tmin=0.279 Tmax=0.395  
AbsCorr = NUMERICAL

Data completeness= 0.995

Theta(max)= 26.371

R(reflections)= 0.0474( 5339)

wR2(reflections)= 0.1439( 6960)

S = 1.043

Npar= 592

---

The following ALERTS were generated. Each ALERT has the format

**test-name\_ALERT\_alert-type\_alert-level.**

Click on the hyperlinks for more details of the test.

### Alert level B

PLAT230\_ALERT\_2\_B Hirshfeld Test Diff for F40 -- C37 .. 11.4 s.u.

### Alert level C

PLAT041\_ALERT\_1\_C Calc. and Reported SumFormula Strings Differ Please Check  
 PLAT043\_ALERT\_1\_C Calculated and Reported Mol. Weight Differ by .. 6.05 Check  
 PLAT068\_ALERT\_1\_C Reported F000 Differs from Calcd (or Missing)... Please Check  
 PLAT215\_ALERT\_3\_C Disordered F25 has ADP max/min Ratio ..... 3.7 Note  
 PLAT215\_ALERT\_3\_C Disordered F26 has ADP max/min Ratio ..... 3.6 Note  
 PLAT215\_ALERT\_3\_C Disordered F65 has ADP max/min Ratio ..... 3.7 Note  
 PLAT215\_ALERT\_3\_C Disordered C27 has ADP max/min Ratio ..... 3.5 Note  
 PLAT220\_ALERT\_2\_C Non-Solvent Resd 1 C Ueq(max)/Ueq(min) Range 3.2 Ratio  
 PLAT220\_ALERT\_2\_C Non-Solvent Resd 1 F Ueq(max)/Ueq(min) Range 3.3 Ratio  
 PLAT234\_ALERT\_4\_C Large Hirshfeld Difference F49 -- C47 .. 0.17 Ang.  
 PLAT234\_ALERT\_4\_C Large Hirshfeld Difference F58 -- C57 .. 0.25 Ang.  
 PLAT234\_ALERT\_4\_C Large Hirshfeld Difference F59 -- C57 .. 0.17 Ang.  
 PLAT234\_ALERT\_4\_C Large Hirshfeld Difference F60 -- C57 .. 0.20 Ang.  
 PLAT234\_ALERT\_4\_C Large Hirshfeld Difference C53 -- C54 .. 0.16 Ang.  
 PLAT241\_ALERT\_2\_C High 'MainMol' Ueq as Compared to Neighbors of Ag1 Check  
 PLAT241\_ALERT\_2\_C High 'MainMol' Ueq as Compared to Neighbors of 052 Check  
 PLAT242\_ALERT\_2\_C Low 'MainMol' Ueq as Compared to Neighbors of Ag5 Check  
 PLAT242\_ALERT\_2\_C Low 'MainMol' Ueq as Compared to Neighbors of 021 Check  
 PLAT242\_ALERT\_2\_C Low 'MainMol' Ueq as Compared to Neighbors of C14 Check  
 PLAT242\_ALERT\_2\_C Low 'MainMol' Ueq as Compared to Neighbors of C23 Check  
 PLAT242\_ALERT\_2\_C Low 'MainMol' Ueq as Compared to Neighbors of C33 Check  
 PLAT242\_ALERT\_2\_C Low 'MainMol' Ueq as Compared to Neighbors of C34 Check  
 PLAT242\_ALERT\_2\_C Low 'MainMol' Ueq as Compared to Neighbors of C44 Check  
 PLAT242\_ALERT\_2\_C Low 'MainMol' Ueq as Compared to Neighbors of C53 Check  
 PLAT242\_ALERT\_2\_C Low 'MainMol' Ueq as Compared to Neighbors of C54 Check  
 PLAT342\_ALERT\_3\_C Low Bond Precision on C-C Bonds ..... 0.01438 Ang.  
 PLAT790\_ALERT\_4\_C Centre of Gravity not Within Unit Cell: Resd. # 1 Note  
 C15 Ag5 F25 O13  
 PLAT906\_ALERT\_3\_C Large K value in the Analysis of Variance ..... 3.570 Check  
 PLAT978\_ALERT\_2\_C Number C-C Bonds with Positive Residual Density. 0 Note

### Alert level G

FORMU01\_ALERT\_2\_G There is a discrepancy between the atom counts in the  
 \_chemical\_formula\_sum and the formula from the \_atom\_site\* data.  
 Atom count from \_chemical\_formula\_sum: C15 H6 Ag5 F25 O13  
 Atom count from the \_atom\_site data: C15 Ag5 F25 O13  
 CELLZ01\_ALERT\_1\_G Difference between formula and atom\_site contents detected.  
 CELLZ01\_ALERT\_1\_G WARNING: H atoms missing from atom site list. Is this intentional?  
 From the CIF: \_cell\_formula\_units\_Z 2  
 From the CIF: \_chemical\_formula\_sum C15 H6 Ag5 F25 O13  
 TEST: Compare cell contents of formula and atom\_site data

| atom | Z*formula | cif sites | diff  |
|------|-----------|-----------|-------|
| C    | 30.00     | 30.00     | 0.00  |
| H    | 12.00     | 0.00      | 12.00 |
| Ag   | 10.00     | 10.00     | 0.00  |
| F    | 50.00     | 50.00     | 0.00  |
| O    | 26.00     | 26.00     | 0.00  |

PLAT002\_ALERT\_2\_G Number of Distance or Angle Restraints on AtSite 17 Note  
 PLAT004\_ALERT\_5\_G Polymeric Structure Found with Maximum Dimension 3 Info

|                   |                                                  |              |
|-------------------|--------------------------------------------------|--------------|
| PLAT040_ALERT_1_G | No H-atoms in this Carbon Containing Compound .. | Please Check |
| PLAT042_ALERT_1_G | Calc. and Reported MoietyFormula Strings Differ  | Please Check |
| PLAT152_ALERT_1_G | The Supplied and Calc. Volume s.u. Differ by ... | 2 Units      |
| PLAT172_ALERT_4_G | The CIF-Embedded .res File Contains DFIX Records | 6 Report     |
| PLAT173_ALERT_4_G | The CIF-Embedded .res File Contains DANG Records | 2 Report     |
| PLAT199_ALERT_1_G | Reported _cell_measurement_temperature ..... (K) | 293 Check    |
| PLAT200_ALERT_1_G | Reported _diffrn_ambient_temperature ..... (K)   | 293 Check    |
| PLAT232_ALERT_2_G | Hirshfeld Test Diff (M-X) Ag6 -- O21 ..          | 13.7 s.u.    |
| PLAT232_ALERT_2_G | Hirshfeld Test Diff (M-X) Ag6 -- O52 ..          | 9.4 s.u.     |
| PLAT232_ALERT_2_G | Hirshfeld Test Diff (M-X) Ag6 -- O9_a ..         | 6.8 s.u.     |
| PLAT242_ALERT_2_G | Low 'MainMol' Ueq as Compared to Neighbors of    | C17 Check    |
| PLAT242_ALERT_2_G | Low 'MainMol' Ueq as Compared to Neighbors of    | C37 Check    |
| PLAT242_ALERT_2_G | Low 'MainMol' Ueq as Compared to Neighbors of    | C47 Check    |
| PLAT242_ALERT_2_G | Low 'MainMol' Ueq as Compared to Neighbors of    | C57 Check    |
| PLAT300_ALERT_4_G | Atom Site Occupancy of Ag6 is Constrained at     | 0.5 Check    |
| PLAT300_ALERT_4_G | Atom Site Occupancy of F25 is Constrained at     | 0.5 Check    |
| PLAT300_ALERT_4_G | Atom Site Occupancy of F26 is Constrained at     | 0.5 Check    |
| PLAT300_ALERT_4_G | Atom Site Occupancy of F28 is Constrained at     | 0.5 Check    |
| PLAT300_ALERT_4_G | Atom Site Occupancy of F29 is Constrained at     | 0.5 Check    |
| PLAT300_ALERT_4_G | Atom Site Occupancy of F30 is Constrained at     | 0.5 Check    |
| PLAT300_ALERT_4_G | Atom Site Occupancy of F65 is Constrained at     | 0.5 Check    |
| PLAT300_ALERT_4_G | Atom Site Occupancy of F66 is Constrained at     | 0.5 Check    |
| PLAT300_ALERT_4_G | Atom Site Occupancy of F68 is Constrained at     | 0.5 Check    |
| PLAT300_ALERT_4_G | Atom Site Occupancy of F69 is Constrained at     | 0.5 Check    |
| PLAT300_ALERT_4_G | Atom Site Occupancy of F70 is Constrained at     | 0.5 Check    |
| PLAT300_ALERT_4_G | Atom Site Occupancy of C24 is Constrained at     | 0.5 Check    |
| PLAT300_ALERT_4_G | Atom Site Occupancy of C27 is Constrained at     | 0.5 Check    |
| PLAT300_ALERT_4_G | Atom Site Occupancy of C64 is Constrained at     | 0.5 Check    |
| PLAT300_ALERT_4_G | Atom Site Occupancy of C67 is Constrained at     | 0.5 Check    |
| PLAT301_ALERT_3_G | Main Residue Disorder .....(Resd 1) ..           | 13 % Note    |
| PLAT434_ALERT_2_G | Short Inter HL..HL Contact F15 .. F29 ..         | 2.80 Ang.    |
| PLAT434_ALERT_2_G | Short Inter HL..HL Contact F49 .. F70 ..         | 2.73 Ang.    |
| PLAT434_ALERT_2_G | Short Inter HL..HL Contact F50 .. F56 ..         | 2.84 Ang.    |
| PLAT789_ALERT_4_G | Atoms with Negative _atom_site_disorder_group #  | 1 Check      |
| PLAT860_ALERT_3_G | Number of Least-Squares Restraints .....         | 20 Note      |
| PLAT898_ALERT_4_G | Second Reported H-M Symbol in CIF Ignored .....  | ! Check      |
| PLAT910_ALERT_3_G | Missing # of FCF Reflection(s) Below Theta(Min)  | 4 Note       |
| PLAT912_ALERT_4_G | Missing # of FCF Reflections Above STh/L= 0.600  | 33 Note      |
| PLAT933_ALERT_2_G | Number of OMIT Records in Embedded .res File ... | 1 Note       |

---

0 **ALERT level A** = Most likely a serious problem - resolve or explain  
 1 **ALERT level B** = A potentially serious problem, consider carefully  
 29 **ALERT level C** = Check. Ensure it is not caused by an omission or oversight  
 44 **ALERT level G** = General information/check it is not something unexpected

10 ALERT type 1 CIF construction/syntax error, inconsistent or missing data  
 28 ALERT type 2 Indicator that the structure model may be wrong or deficient  
 9 ALERT type 3 Indicator that the structure quality may be low  
 26 ALERT type 4 Improvement, methodology, query or suggestion  
 1 ALERT type 5 Informative message, check

---

It is advisable to attempt to resolve as many as possible of the alerts in all categories. Often the minor alerts point to easily fixed oversights, errors and omissions in your CIF or refinement strategy, so attention to these fine details can be worthwhile. In order to resolve some of the more serious problems it may be necessary to carry out additional measurements or structure refinements. However, the purpose of your study may justify the reported deviations and the more serious of these should normally be commented upon in the discussion or experimental section of a paper or in the "special\_details" fields of the CIF. checkCIF was carefully designed to identify outliers and unusual parameters, but every test has its limitations and alerts that are not important in a particular case may appear. Conversely, the absence of alerts does not guarantee there are no aspects of the results needing attention. It is up to the individual to critically assess their own results and, if necessary, seek expert advice.

### **Publication of your CIF in IUCr journals**

A basic structural check has been run on your CIF. These basic checks will be run on all CIFs submitted for publication in IUCr journals (*Acta Crystallographica*, *Journal of Applied Crystallography*, *Journal of Synchrotron Radiation*); however, if you intend to submit to *Acta Crystallographica Section C* or *E* or *IUCrData*, you should make sure that full publication checks are run on the final version of your CIF prior to submission.

### **Publication of your CIF in other journals**

Please refer to the *Notes for Authors* of the relevant journal for any special instructions relating to CIF submission.

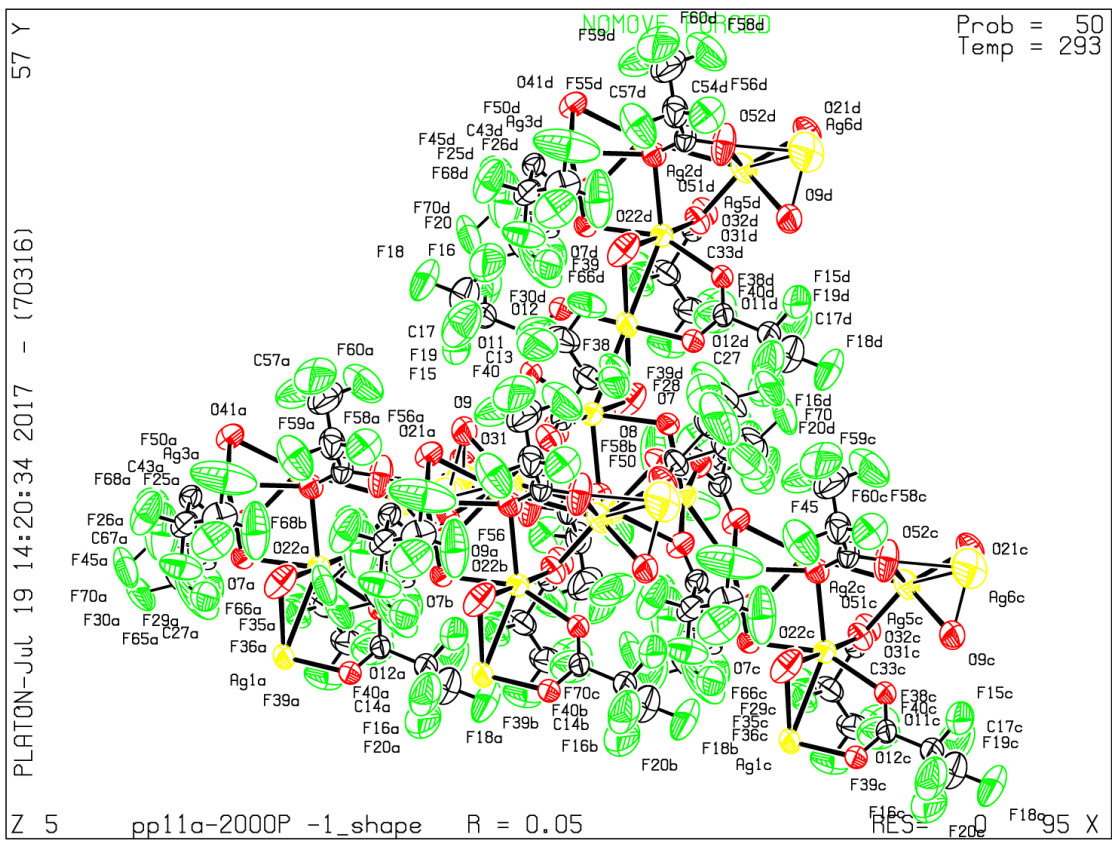

Supplement: s1 [file s1]
